# Supplementary material for: Mössbauer and mass spectrometry support for iron(ii) catalysts in enantioselective C–H activation
Source: Royal Society of Chemistry journal article supplement (doi:10.1039/c9dt00705a), 2019-01-01
Supplement: c9dt00705a1.pdf [file c9dt00705a1.pdf]

## Supporting Information

### Mössbauer and mass spectrometry support for iron(II) catalysts in enantioselective C–H activation

Joachim Loup,<sup>[a]</sup> Tobias Parchomyk,<sup>[a]</sup> Stefan Lülfi,<sup>[a]</sup> Serhiy Demeshko,<sup>[b]</sup> Franc Meyer,<sup>[b]</sup>  
Konrad Koszinowski,<sup>\*[a]</sup> and Lutz Ackermann<sup>\*[a]</sup>

<sup>[a]</sup> Institut für Organische und Biomolekulare Chemie, Georg-August-Universität

Tammannstraße 2, D-37077 Göttingen, Germany

Phone (Fax): +49 551 3933202 (3966777)

<sup>[b]</sup> Institut für Anorganische Chemie, Georg-August-Universität

Tammannstraße 4, D-37077 Göttingen, Germany.

\* E-Mail: Konrad.Koszinowski@chemie.uni-goettingen.de; Lutz.Ackermann@chemie.uni-goettingen.de

## Table of Contents

|                      |      |
|----------------------|------|
| General Remarks      | S-3  |
| Sample Preparation   | S-3  |
| Mössbauer Parameters | S-4  |
| Additional Spectra   | S-6  |
| References           | S-17 |

## General Remarks

In all cases, standard Schlenk techniques were applied. THF was obtained from a MBRAUN MB SPS-800 solvent purification system, or dried over sodium/benzophenone and freshly distilled before use. TMEDA was dried first over calcium hydride, then over sodium, and finally distilled. **L** and **1a** were synthesized as previously reported.<sup>[1]</sup> Grignard reagents were used as purchased: CyMgCl (1.0 M in THF) and PhMgCl (1.9 M in THF).  $^{57}\text{FeCl}_2$  was synthesized from  $^{57}\text{Fe}$ -enriched metal powder (95%, Isoflex) according to the literature.<sup>[2]</sup> Sample solutions were injected into the ESI source of an HCT quadrupole-ion trap mass spectrometer (Bruker Daltonics) at a flow-rate of  $8.0 \mu\text{L min}^{-1}$  and transferred into the helium-filled ion trap under mild conditions.<sup>[3]</sup> Mass spectra were recorded over an  $m/z$  range of 50–1200. Mössbauer spectra were recorded with a  $^{57}\text{Co}$  source in a Rh matrix using an alternating constant acceleration *Wissel* Mössbauer spectrometer operated in the transmission mode and equipped with a *Janis* closed-cycle helium cryostat. Isomer shifts are given relative to iron metal at ambient temperature. Simulation of the experimental data was performed with the *Mfit* program using *Lorentzian* line doublets.<sup>[4]</sup>

## Sample Preparation

### ESI-MS

Standard sample solutions were prepared by the addition of the Grignard reagent (8.0 equiv) to a solution of  $\text{Fe}(\text{acac})_3$  (1.0 equiv), TMEDA (4.0 equiv) in THF at  $-78 \text{ }^\circ\text{C}$ , and dilution to 10 mM. **L** and **1a** were added before the Grignard reagent.

### Mössbauer Spectroscopy

Mössbauer sample solutions were prepared by the addition of the Grignard reagent (8.0 equiv) to solutions of  $^{57}\text{FeCl}_2$  (5.0 mM, 1.0 equiv) and TMEDA (4.0 equiv) in THF in a  $\text{N}_2$ -filled glovebox (unless specified otherwise: at  $-20 \text{ }^\circ\text{C}$  for CyMgCl, and at  $23 \text{ }^\circ\text{C}$  for PhMgCl) and directly transferred into the Mössbauer sample cell before *immediately* freezing in liquid nitrogen (outside of the glovebox). **L** and **1a** were added before the Grignard reagent.

## Mössbauer Parameters

**Table S1. Reactions with CyMgCl**

| Reaction                                                                                                                              | Figure   | $\delta$ [mm s <sup>-1</sup> ] | $\Delta E_Q$ [mm s <sup>-1</sup> ] | Rel. int. [%] | Color   | Assignment                               |
|---------------------------------------------------------------------------------------------------------------------------------------|----------|--------------------------------|------------------------------------|---------------|---------|------------------------------------------|
| <sup>57</sup> FeCl <sub>2</sub> (5.0 mM) +<br>TMEDA (4.0 equiv) +<br>CyMgCl (8.0 equiv)                                               | Fig. 1b  | 0.48                           | 0.89                               | 84            | blue    | Cy <sub>4</sub> Fe(III) <sup>-</sup>     |
|                                                                                                                                       |          | 0.21                           | 1.56                               | 16            | red     | Cy <sub>3</sub> Fe(II) <sup>-</sup>      |
| <sup>57</sup> FeCl <sub>2</sub> (5.0 mM) +<br>TMEDA (4.0 equiv) +<br>CyMgCl (8.0 equiv) <sup>[a]</sup>                                | Fig. S2  | 0.48                           | 0.88                               | 85            | blue    | Cy <sub>4</sub> Fe(III) <sup>-</sup>     |
|                                                                                                                                       |          | 0.24                           | 1.59                               | 15            | red     | Cy <sub>3</sub> Fe(II) <sup>-</sup>      |
| <sup>57</sup> FeCl <sub>2</sub> (5.0 mM) +<br>TMEDA (4.0 equiv) +<br>CyMgCl (8.0 equiv) <sup>[b]</sup>                                | Fig. S3  | 0.19                           | 0.86                               | 68            | gray    | ---                                      |
|                                                                                                                                       |          | 0.48                           | 0.91                               | 28            | blue    | Cy <sub>4</sub> Fe(III) <sup>-</sup>     |
|                                                                                                                                       |          | -0.10                          | 1.10                               | 3             | yellow  | ---                                      |
| <sup>57</sup> FeCl <sub>2</sub> (5.0 mM) +<br>TMEDA (4.0 equiv) +<br>L (1.0 equiv) +<br>CyMgCl (8.0 equiv)                            | Fig. 2b  | 0.18                           | 1.59                               | 36            | red     | Cy <sub>3</sub> Fe(II) <sup>-</sup>      |
|                                                                                                                                       |          | 0.39                           | 3.19                               | 27            | green   | Cy <sub>2</sub> Fe(II)(NHC)              |
|                                                                                                                                       |          | 0.46                           | 0.98                               | 19            | blue    | Cy <sub>4</sub> Fe(III) <sup>-</sup>     |
|                                                                                                                                       |          | 0.54                           | 2.04                               | 11            | magenta | Cy <sub>3</sub> Fe(II)(NHC) <sup>-</sup> |
|                                                                                                                                       |          | 0.24                           | 0.40                               | 7             | cyan    | ---                                      |
| <sup>57</sup> FeCl <sub>2</sub> (5.0 mM) +<br>TMEDA (4.0 equiv) +<br>L (1.0 equiv) +<br>CyMgCl (8.0 equiv) <sup>[b]</sup>             | Fig. S10 | 0.22                           | 1.57                               | 47            | red     | Cy <sub>3</sub> Fe(II) <sup>-</sup>      |
|                                                                                                                                       |          | 0.22                           | 0.57                               | 34            | cyan    | ---                                      |
|                                                                                                                                       |          | 0.75                           | 1.57                               | 10            | purple  | ---                                      |
|                                                                                                                                       |          | 0.37                           | 3.20                               | 9             | green   | Cy <sub>2</sub> Fe(II)(NHC)              |
| <sup>57</sup> FeCl <sub>2</sub> (5.0 mM) +<br>TMEDA (4.0 equiv) +<br>L (1.0 equiv) + <b>1a</b><br>(1.0 equiv) + CyMgCl<br>(8.0 equiv) | Fig. S13 | 0.20                           | 1.71                               | 53            | red     | Cy <sub>3</sub> Fe(II) <sup>-</sup>      |
|                                                                                                                                       |          | 0.43                           | 3.13                               | 21            | green   | Cy <sub>2</sub> Fe(II)(NHC)              |
|                                                                                                                                       |          | 0.58                           | 2.04                               | 18            | magenta | Cy <sub>3</sub> Fe(II)(NHC) <sup>-</sup> |
|                                                                                                                                       |          | 0.47                           | 0.84                               | 8             | blue    | Cy <sub>4</sub> Fe(III) <sup>-</sup>     |

[a] Recorded at 7 K. [b] Prepared at 23 °C. NHC = C<sub>49</sub>H<sub>54</sub>N<sub>2</sub>.

**Table S2. Reactions with PhMgCl**

| Reaction                                                                                                                              | Figure   | $\delta$ [mm s <sup>-1</sup> ] | $\Delta E_Q$ [mm s <sup>-1</sup> ] | Rel. int. [%] | Color       | Assignment                           |
|---------------------------------------------------------------------------------------------------------------------------------------|----------|--------------------------------|------------------------------------|---------------|-------------|--------------------------------------|
| <sup>57</sup> FeCl <sub>2</sub> (5.0 mM) +<br>TMEDA (4.0 equiv) +<br>PhMgCl (8.0 equiv)                                               | Fig. S4  | 0.54                           | 1.12                               | 78            | blue        | Ph <sub>4</sub> Fe(III) <sup>-</sup> |
|                                                                                                                                       |          | 0.20                           | 1.44                               | 13            | red         | Ph <sub>3</sub> Fe(II) <sup>-</sup>  |
|                                                                                                                                       |          | 0.46                           | 2.61                               | 9             | dark yellow | ---                                  |
| <sup>57</sup> FeCl <sub>2</sub> (5.0 mM) +<br>TMEDA (4.0 equiv) +<br>L (1.0 equiv) +<br>PhMgCl (8.0 equiv)                            | Fig. S9  | 0.51                           | 1.09                               | 40            | blue        | Ph <sub>4</sub> Fe(III) <sup>-</sup> |
|                                                                                                                                       |          | 0.22                           | 4.25                               | 39            | green       | Ph <sub>2</sub> Fe(II)(NHC)          |
|                                                                                                                                       |          | 0.56                           | 2.62                               | 14            | light green | ---                                  |
|                                                                                                                                       |          | 0.32                           | 1.70                               | 4             | orange      | ---                                  |
|                                                                                                                                       |          | 1.10                           | 4.30                               | 3             | wine        | ---                                  |
| <sup>57</sup> FeCl <sub>2</sub> (5.0 mM) +<br>TMEDA (4.0 equiv) +<br>L (1.0 equiv) + <b>1a</b><br>(1.0 equiv) + PhMgCl<br>(8.0 equiv) | Fig. S14 | 0.51                           | 1.09                               | 52            | blue        | Ph <sub>4</sub> Fe(III) <sup>-</sup> |
|                                                                                                                                       |          | 0.22                           | 4.21                               | 36            | green       | Ph <sub>2</sub> Fe(II)(NHC)          |
|                                                                                                                                       |          | 0.57                           | 2.64                               | 7             | light green | ---                                  |
|                                                                                                                                       |          | 0.32                           | 1.70                               | 4             | orange      | ---                                  |
|                                                                                                                                       |          | 1.10                           | 4.30                               | 2             | wine        | ---                                  |

## Additional Spectra

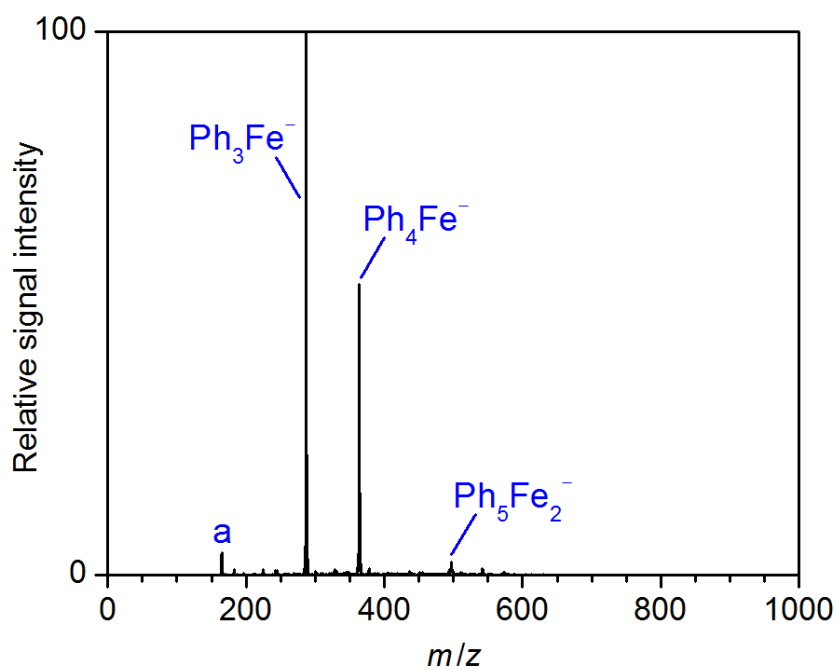

**Fig. S1.** Negative-ion mode ESI spectrum of a solution of the products formed in the reaction of  $\text{Fe}(\text{acac})_3$  (10 mM) with TMEDA (4.0 equiv) and  $\text{PhMgCl}$  (8.0 equiv) in THF;  $a = [\text{Ph,Fe,O}_2]^-$ .

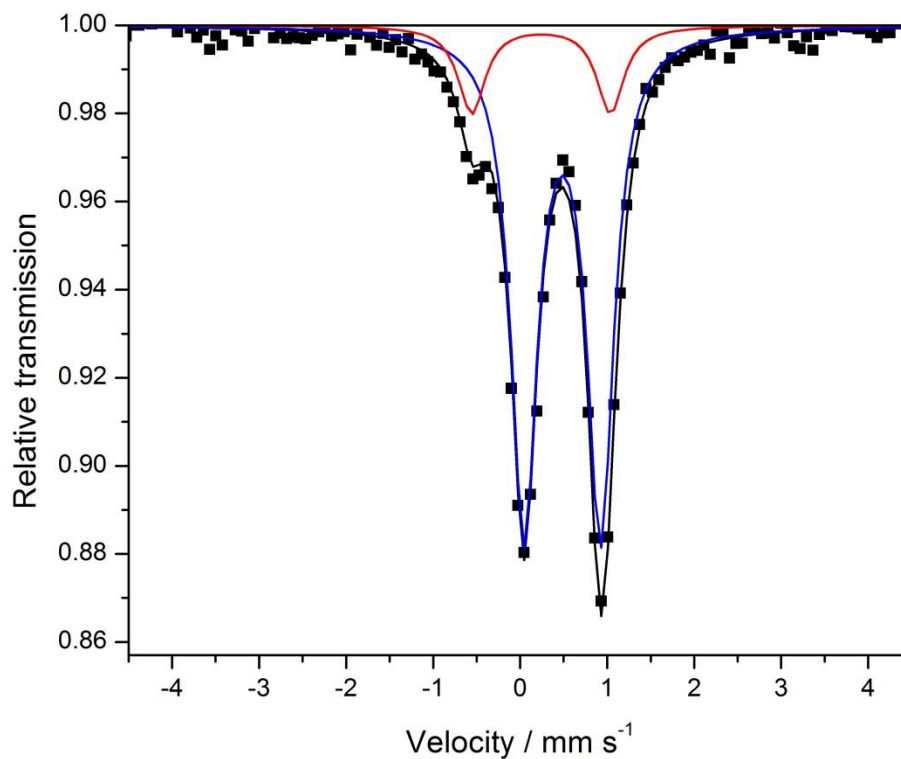

**Fig. S2.** Mössbauer spectrum and components of the fit of a frozen solution ( $T = 7$  K) of the products formed in the reaction of  $^{57}\text{FeCl}_2$  (5.0 mM), TMEDA (4.0 equiv) and CyMgCl (8.0 equiv) in THF; components of the fit:  $\delta(\text{blue}) = 0.48 \text{ mm s}^{-1}$ ,  $\Delta E_Q(\text{blue}) = 0.88 \text{ mm s}^{-1}$ , rel. int. = 85%;  $\delta(\text{red}) = 0.24 \text{ mm s}^{-1}$ ,  $\Delta E_Q(\text{red}) = 1.59 \text{ mm s}^{-1}$ , rel. int. = 15%.

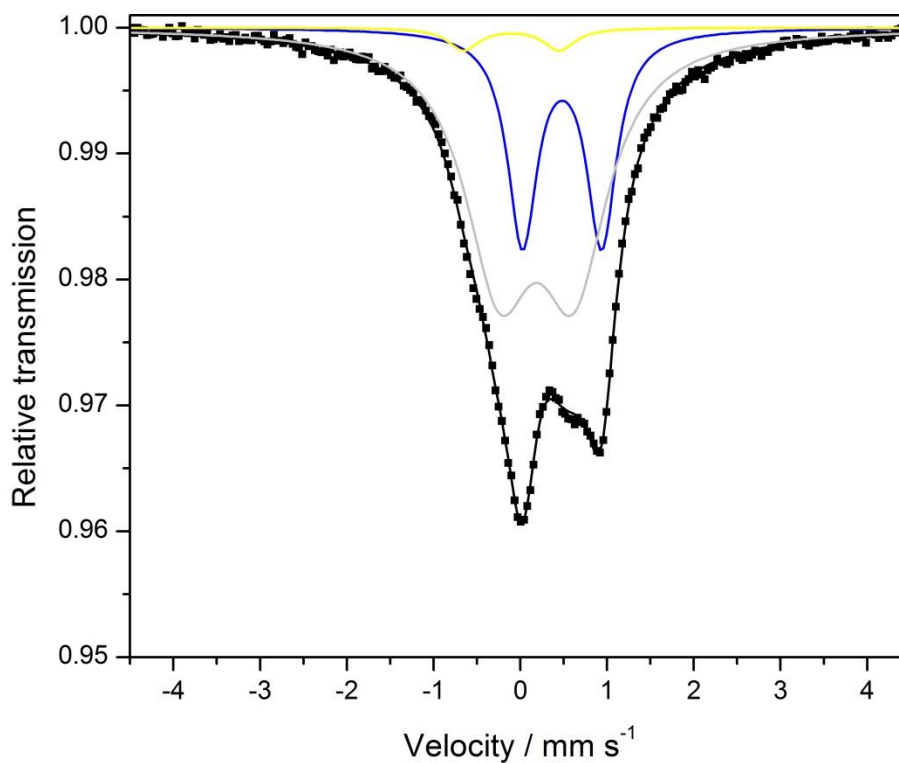

**Fig. S3.** Mössbauer spectrum and components of the fit of a frozen solution ( $T = 80$  K) of the products formed in the reaction of  $^{57}\text{FeCl}_2$  (5.0 mM), TMEDA (4.0 equiv) and  $\text{CyMgCl}$  (8.0 equiv) in THF at 23 °C; components of the fit:  
 $\delta(\text{gray}) = 0.19 \text{ mm s}^{-1}$ ,  $\Delta E_Q(\text{gray}) = 0.86 \text{ mm s}^{-1}$ , rel. int. = 68%;  
 $\delta(\text{blue}) = 0.48 \text{ mm s}^{-1}$ ,  $\Delta E_Q(\text{blue}) = 0.91 \text{ mm s}^{-1}$ , rel. int. = 28%;  
 $\delta(\text{yellow}) = -0.10 \text{ mm s}^{-1}$ ,  $\Delta E_Q(\text{yellow}) = 1.10 \text{ mm s}^{-1}$ , rel. int. = 3%.



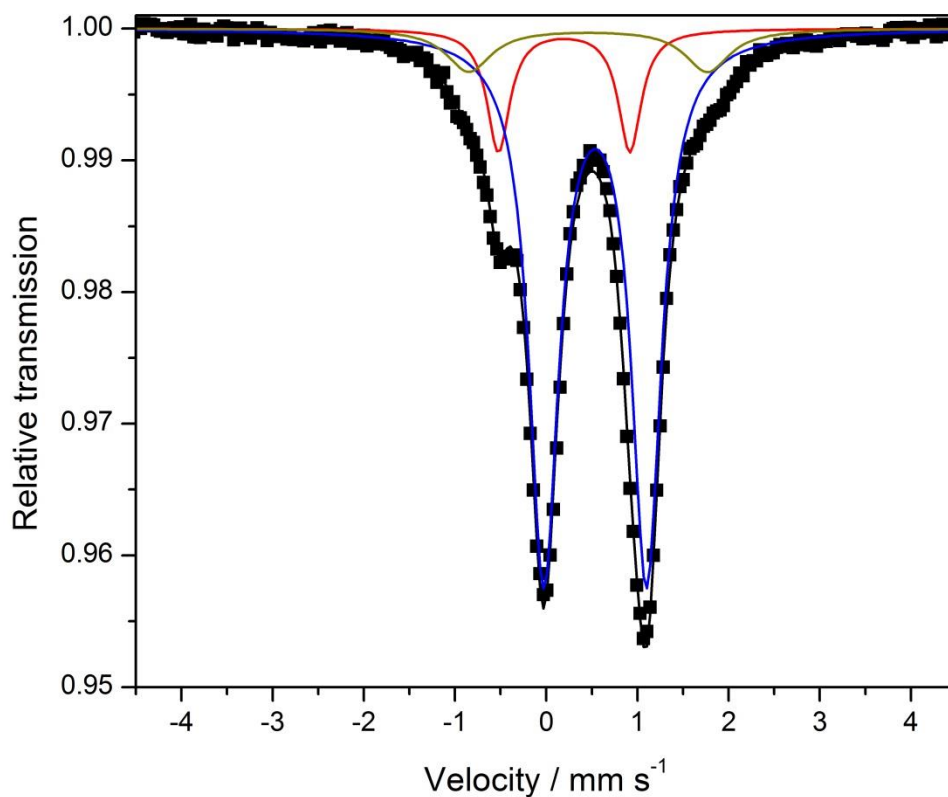

**Fig. S4.** Mössbauer spectrum and components of the fit of a frozen solution ( $T = 80$  K) of the products formed in the reaction of  $^{57}\text{FeCl}_2$  (5.0 mM), TMEDA (4.0 equiv) and PhMgCl (8.0 equiv) in THF; components of the fit:  $\delta$ (blue) =  $0.54 \text{ mm s}^{-1}$ ,  $\Delta E_Q$ (blue) =  $1.12 \text{ mm s}^{-1}$ , rel. int. = 78%;  $\delta$ (red) =  $0.20 \text{ mm s}^{-1}$ ,  $\Delta E_Q$ (red) =  $1.44 \text{ mm s}^{-1}$ , rel. int. = 13%;  $\delta$ (dark yellow) =  $0.46 \text{ mm s}^{-1}$ ,  $\Delta E_Q$ (dark yellow) =  $2.61 \text{ mm s}^{-1}$ , rel. int. = 9%.

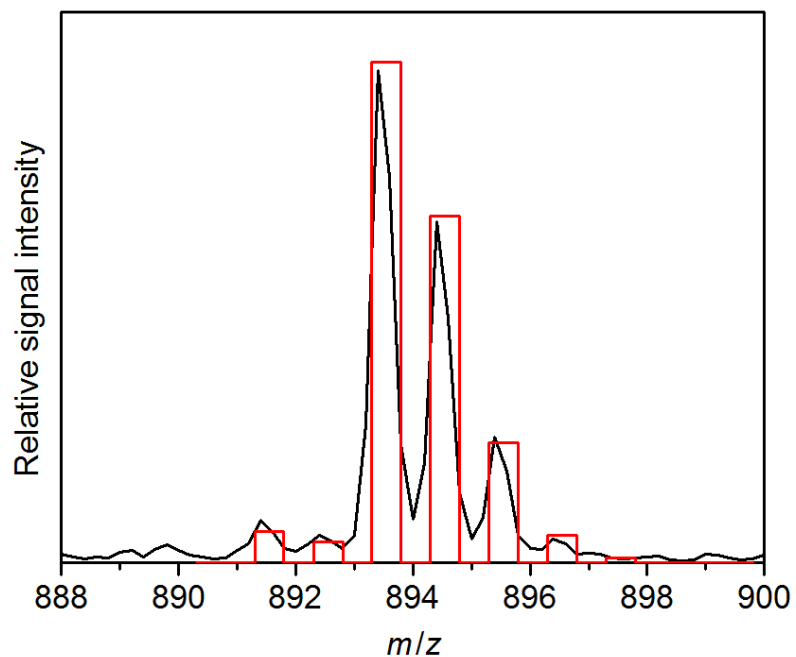

**Fig. S5.** Comparison of the observed (black) and simulated (red) isotope pattern of  $\text{Cy}_2\text{FeH}(\text{NHC})^-$ ;  $\text{NHC} = \text{C}_{49}\text{H}_{54}\text{N}_2$ .

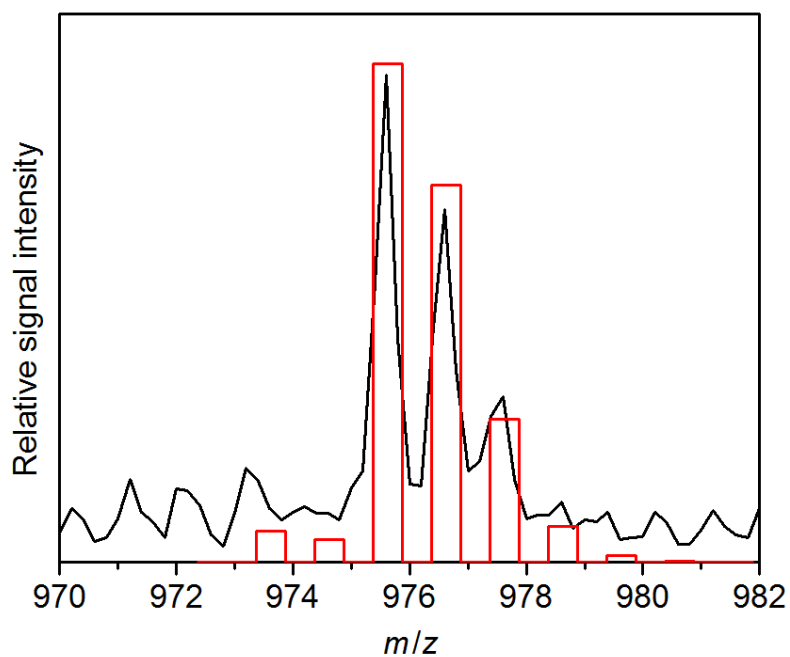

**Fig. S6.** Comparison of the observed (black) and simulated (red) isotope pattern of  $\text{Cy}_3\text{Fe}(\text{NHC})^-$ ;  $\text{NHC} = \text{C}_{49}\text{H}_{54}\text{N}_2$ .

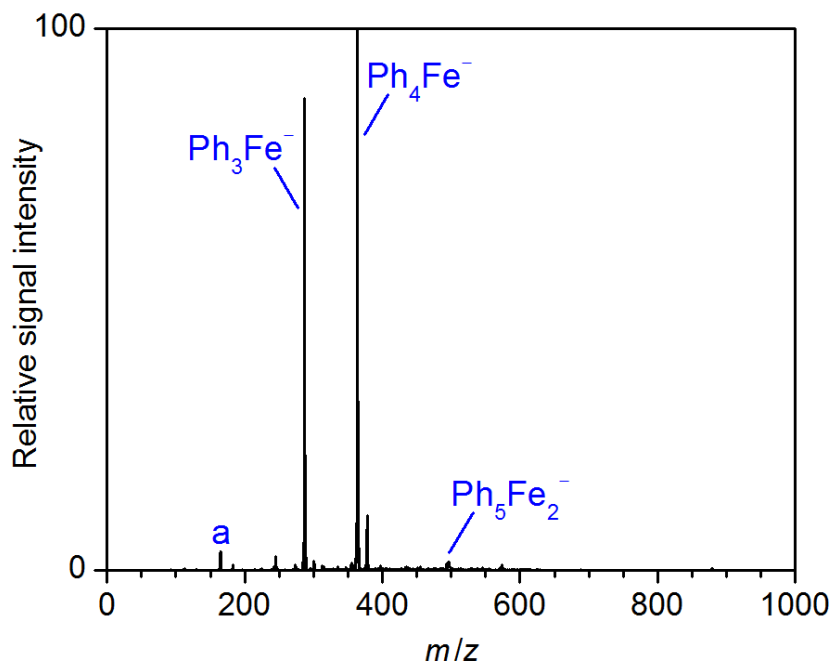

**Fig. S7.** Negative-ion mode ESI spectrum of a solution of the products formed in the reaction of  $\text{Fe}(\text{acac})_3$  (10 mM) with TMEDA (4.0 equiv),  $\text{PhMgCl}$  (8.0 equiv) and **L** (1.0 equiv) in THF;  $a = [\text{Ph,Fe,O}_2]^-$ .

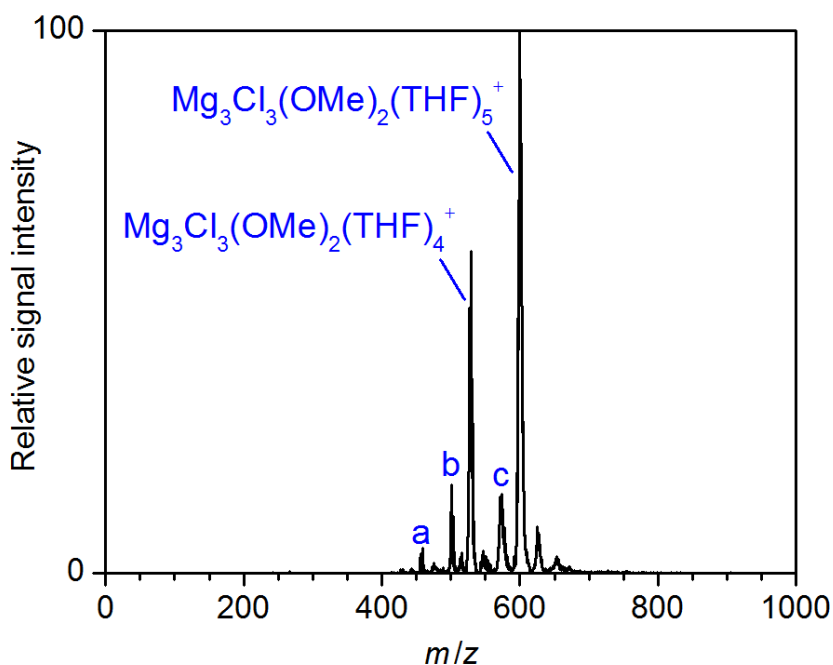

**Fig. S8.** Positive-ion mode ESI spectrum representative of all experiments;  $a = \text{Mg}_3\text{Cl}_3(\text{OMe})(\text{OH})(\text{TMEDA})^{2+}$ ,  $b = \text{Mg}_3\text{Cl}_3(\text{OMe})_2(\text{THF})_2(\text{TMEDA})^+$ ,  $c = \text{Mg}_3\text{Cl}_3(\text{OMe})_2(\text{THF})_3(\text{TMEDA})^+$ . The incorporated methoxide originates from traces of methanol as reported previously.<sup>[5]</sup>

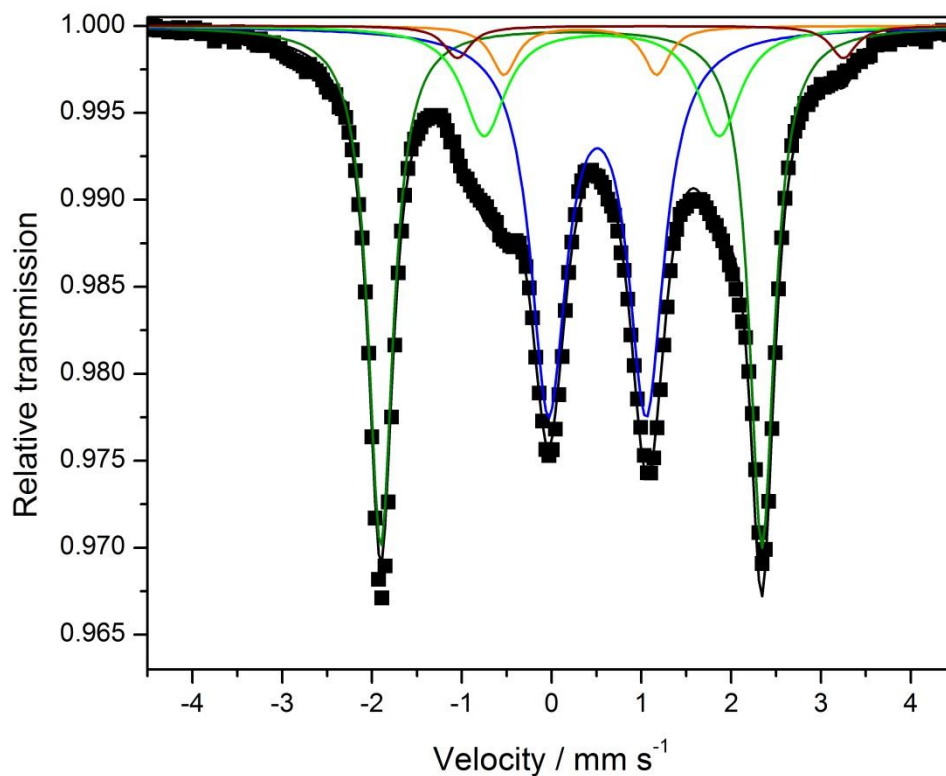

**Fig. S9.** Mössbauer spectrum and components of the fit of a frozen solution ( $T = 80$  K) of the products formed in the reaction of  $^{57}\text{FeCl}_2$  (5.0 mM), TMEDA (4.0 equiv),  $\text{PhMgCl}$  (8.0 equiv) and **L** (1.0 equiv) in THF; components of the fit:  $\delta(\text{blue}) = 0.51 \text{ mm s}^{-1}$ ,  $\Delta E_Q(\text{blue}) = 1.09 \text{ mm s}^{-1}$ , rel. int. = 40%;  $\delta(\text{green}) = 0.22 \text{ mm s}^{-1}$ ,  $\Delta E_Q(\text{green}) = 4.25 \text{ mm s}^{-1}$ , rel. int. = 39%;  $\delta(\text{light green}) = 0.56 \text{ mm s}^{-1}$ ,  $\Delta E_Q(\text{light green}) = 2.62 \text{ mm s}^{-1}$ , rel. int. = 14%;  $\delta(\text{orange}) = 0.32 \text{ mm s}^{-1}$ ,  $\Delta E_Q(\text{orange}) = 1.70 \text{ mm s}^{-1}$ , rel. int. = 4%;  $\delta(\text{wine}) = 1.10 \text{ mm s}^{-1}$ ,  $\Delta E_Q(\text{wine}) = 4.30 \text{ mm s}^{-1}$ , rel. int. = 3%.

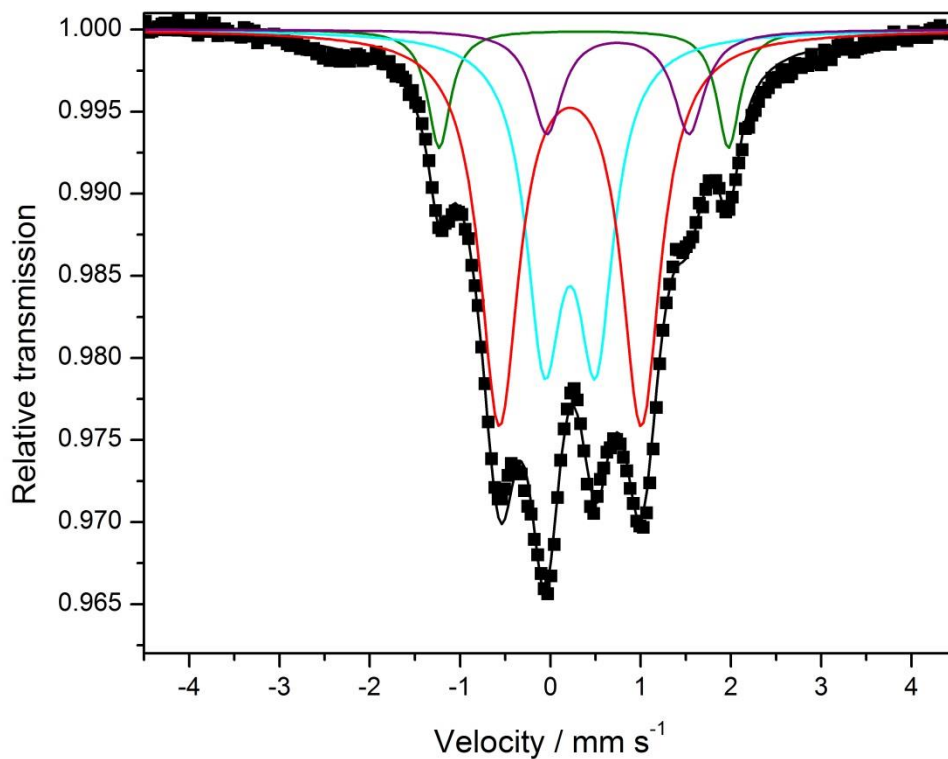

**Fig. S10.** Mössbauer spectrum and components of the fit of a frozen solution ( $T = 80$  K) of the products formed in the reaction of  $^{57}\text{FeCl}_2$  (5.0 mM), TMEDA (4.0 equiv),  $\text{CyMgCl}$  (8.0 equiv) and **L** (1.0 equiv) in THF at 23 °C; components of the fit:  $\delta(\text{red}) = 0.22 \text{ mm s}^{-1}$ ,  $\Delta E_Q(\text{red}) = 1.57 \text{ mm s}^{-1}$ , rel. int. = 47%;  $\delta(\text{cyan}) = 0.22 \text{ mm s}^{-1}$ ,  $\Delta E_Q(\text{cyan}) = 0.57 \text{ mm s}^{-1}$ , rel. int. = 34%;  $\delta(\text{purple}) = 0.75 \text{ mm s}^{-1}$ ,  $\Delta E_Q(\text{purple}) = 1.57 \text{ mm s}^{-1}$ , rel. int. = 10%;  $\delta(\text{green}) = 0.37 \text{ mm s}^{-1}$ ,  $\Delta E_Q(\text{green}) = 3.20 \text{ mm s}^{-1}$ , rel. int. = 9%.

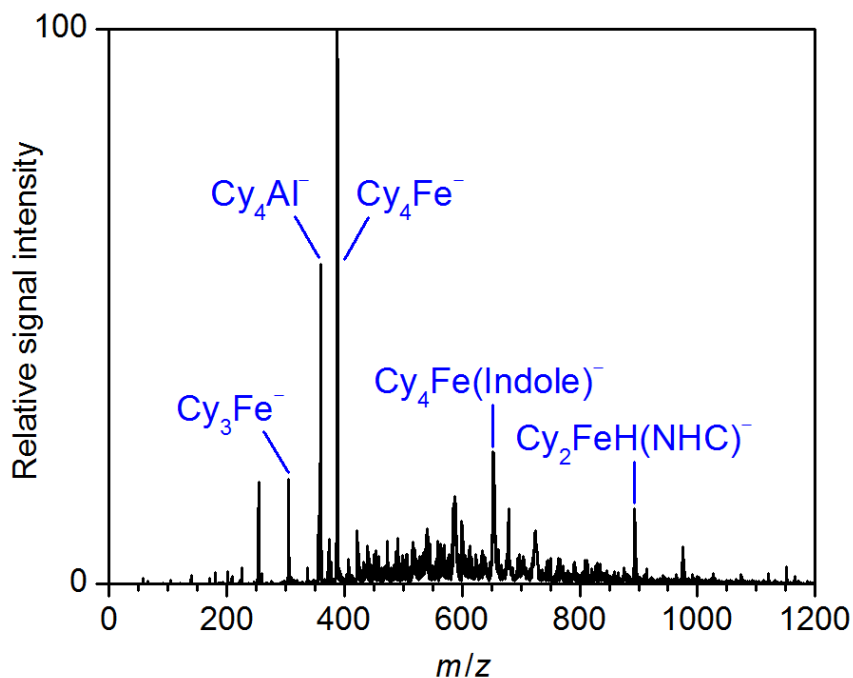

**Fig. S11.** Negative-ion mode ESI spectrum of a solution of the products formed in the reaction of  $\text{Fe}(\text{acac})_3$  (10 mM) with TMEDA (4.0 equiv),  $\text{CyMgCl}$  (8.0 equiv), **L** (1.0 equiv) and **1a** (1.0 equiv) in THF.

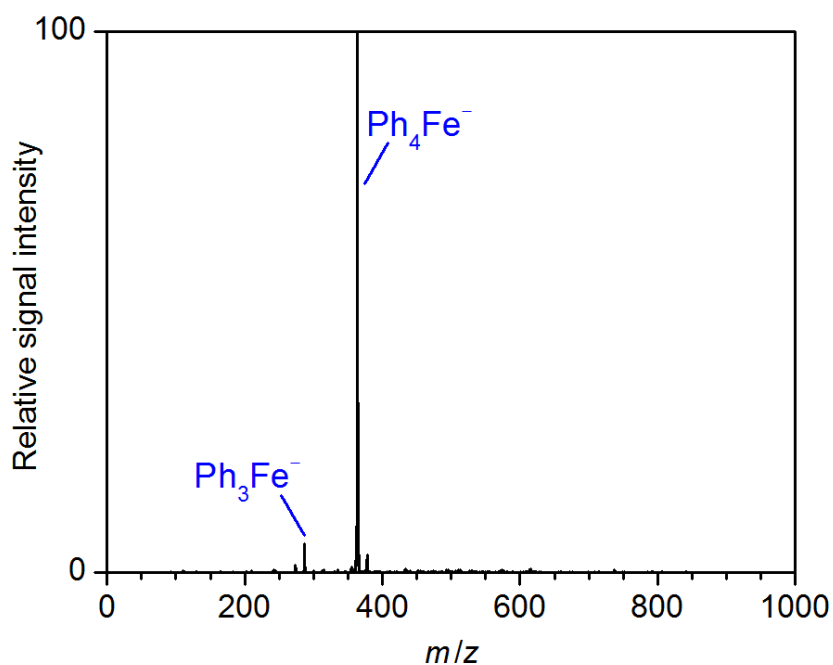

**Fig. S12.** Negative-ion mode ESI spectrum of a solution of the products formed in the reaction of  $\text{Fe}(\text{acac})_3$  (10 mM) with TMEDA (4.0 equiv),  $\text{PhMgCl}$  (8.0 equiv), **L** (1.0 equiv) and **1a** (1.0 equiv) in THF.

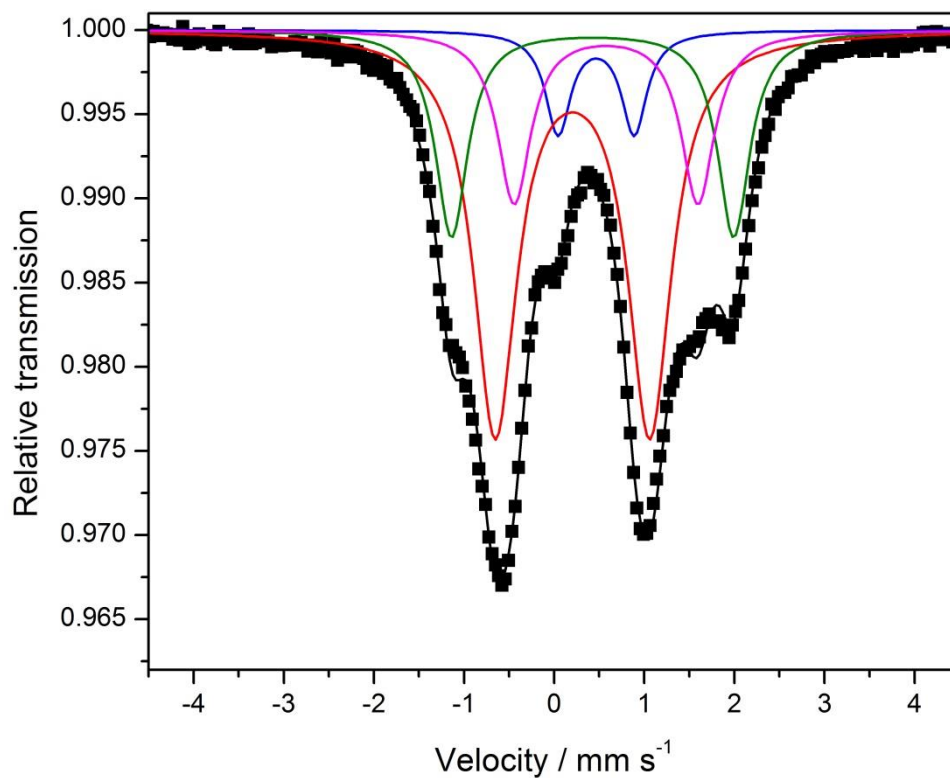

**Fig. S13.** Mössbauer spectrum and components of the fit of a frozen solution ( $T = 80$  K) of the products formed in the reaction of  $^{57}\text{FeCl}_2$  (5.0 mM), TMEDA (4.0 equiv), CyMgCl (8.0 equiv), **L** (1.0 equiv) and **1a** (1.0 equiv) in THF; components of the fit:  $\delta(\text{red}) = 0.20 \text{ mm s}^{-1}$ ,  $\Delta E_Q(\text{red}) = 1.71 \text{ mm s}^{-1}$ , rel. int. = 53%;  $\delta(\text{green}) = 0.43 \text{ mm s}^{-1}$ ,  $\Delta E_Q(\text{green}) = 3.13 \text{ mm s}^{-1}$ , rel. int. = 21%;  $\delta(\text{magenta}) = 0.58 \text{ mm s}^{-1}$ ,  $\Delta E_Q(\text{magenta}) = 2.04 \text{ mm s}^{-1}$ , rel. int. = 18%;  $\delta(\text{blue}) = 0.47 \text{ mm s}^{-1}$ ,  $\Delta E_Q(\text{blue}) = 0.84 \text{ mm s}^{-1}$ , rel. int. = 8%.

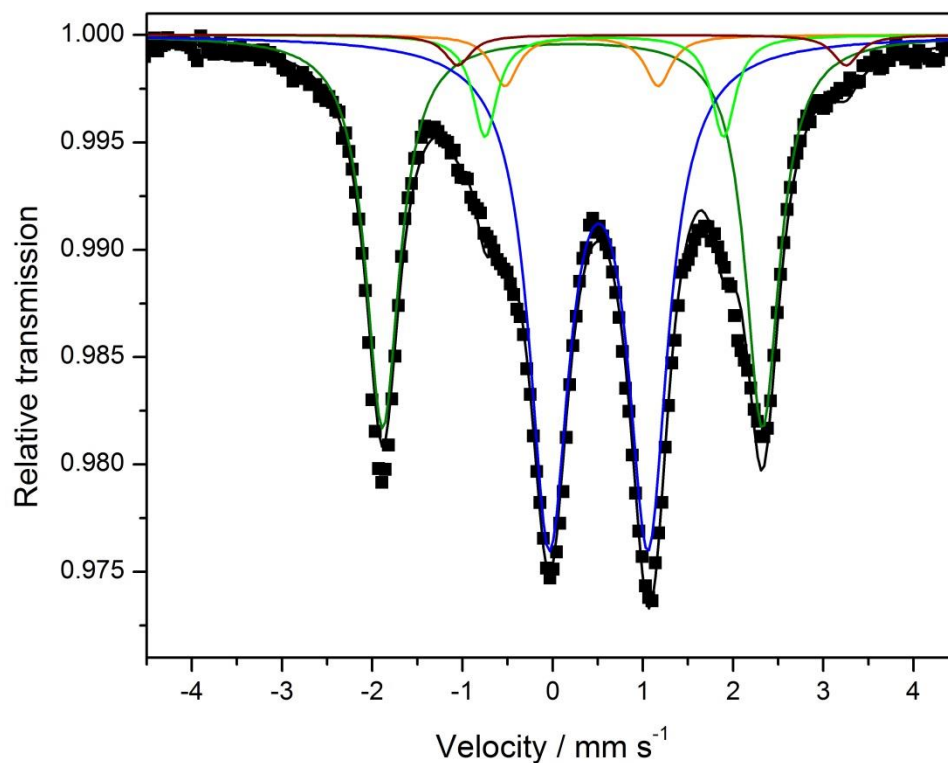

**Fig. S14.** Mössbauer spectrum and components of the fit of a frozen solution ( $T = 80$  K) of the products formed in the reaction of  $^{57}\text{FeCl}_2$  (5.0 mM), TMEDA (4.0 equiv), PhMgCl (8.0 equiv), **L** (1.0 equiv) and **1a** (1.0 equiv) in THF; components of the fit:  $\delta(\text{blue}) = 0.51 \text{ mm s}^{-1}$ ,  $\Delta E_Q(\text{blue}) = 1.09 \text{ mm s}^{-1}$ , rel. int. = 52%;  $\delta(\text{green}) = 0.22 \text{ mm s}^{-1}$ ,  $\Delta E_Q(\text{green}) = 4.21 \text{ mm s}^{-1}$ , rel. int. = 36%;  $\delta(\text{light green}) = 0.57 \text{ mm s}^{-1}$ ,  $\Delta E_Q(\text{light green}) = 2.64 \text{ mm s}^{-1}$ , rel. int. = 7%;  $\delta(\text{orange}) = 0.32 \text{ mm s}^{-1}$ ,  $\Delta E_Q(\text{orange}) = 1.70 \text{ mm s}^{-1}$ , rel. int. = 4%;  $\delta(\text{wine}) = 1.10 \text{ mm s}^{-1}$ ,  $\Delta E_Q(\text{wine}) = 4.30 \text{ mm s}^{-1}$ , rel. int. = 2%.



## References

1. J. Loup, D. Zell, J. C. A. Oliveira, H. Keil, D. Stalke, L. Ackermann, *Angew. Chem. Int. Ed.* **2017**, *56*, 14197–14201.
2. G. Winter, D. W. Thompson, J. R. Loehe, *Inorg. Synth.* **2007**, *14*, 99–104.
3. K. Koszinowski, *J. Am. Chem. Soc.* **2010**, *132*, 6032–6040.
4. E. Bill, *Mfit Program*; Max-Planck Institute for Chemical Energy Conversion: Mülheim/Ruhr, Germany, 2008.
5. a) T. Parchomyk, S. Demeshko, F. Meyer, K. Koszinowski, *J. Am. Chem. Soc.* **2018**, *140*, 9709–9720; b) S. B. Muñoz III, S. L. Daifuku, J. D. Sears, T. M. Baker, S. H. Carpenter, W. W. Brennessel, M. L. Neidig, *Angew. Chem. Int. Ed.* **2018**, *57*, 6496–6500; c) C. Schnegelsberg, T. D. Blümke, K. Koszinowski, *J. Mass Spectrom.* **2015**, *50*, 1393–1395.
